# Supplementary material
Source: PubMed Central journal article supplement (PMC10156791)

### *Western blot analysis*

Total proteins were extracted with RIPA buffer (150mM NaCl, 25mM Tris-HCl pH7.6, 50mM EDTA pH8.0, 1% Triton X-100, 1% Na-deoxycholate, 0.1% SDS) and their concentration was determined by Bradford's colorimetric assay. Equal amounts of total protein/lane (30 µg/lane) were subjected to SDS-polyacrylamide (SDS-PAGE) electrophoresis under reducing conditions. Gels were electroblotted onto nitrocellulose membrane using a Trans-blot Turbo Transfer system (Cat.1704150, Bio-Rad, USA) for 3 min at 2.5 mA and 25V, and a Ponceau (Cat. R-03021-D50, Advansta, USA) staining was performed to verify the protein transfer efficiency and loading amount. Membranes were blocked with Everyblot blocking solution (Cat. 12010020, Bio-Rad, USA) for 5 min at room temperature and immunoreacted overnight at 4°C with the following primary antibodies (SantaCruz Biotechnology, USA): anti-FAAH (27-Y) (1:1000, Cat. sc-100739), anti-MAGL (C-11) (1:2000, Cat. sc-398942), anti-DAGL $\alpha$  (E6) (1:1000, Cat. sc-398942), anti-CB2 (3C7) (1:2000, Cat. sc-293188), anti-CB1 (2F9) (1:1000, Cat. sc-293419). After washings with TBS-T (TBS supplemented with 0.05% Tween-20), membranes were incubated with the horseradish peroxidase-conjugated anti-mouse secondary antibody for 60 min (1:10000, Cat. 7076, Cell Signaling, USA). Antibodies were diluted in 3% BSA-TBST. Membrane was washed with TBS-T per 5 min, followed by washing in TBS, and processed for chemiluminescence detection (Clarity Western ECL substrate, Cat. 1705060, Bio-Rad, USA). Chemiluminescence signals were detected in a ChemiDoc XRS+ system (Cat.1708265, Bio-Rad, USA) and analyzed by ImageLab Software. Protein levels were normalized to Ponceau staining (1, 2) and expressed as fold changes relative to the correspondent WT group.

### References

1. Gilda JE, Gomes AV. Stain-Free total protein staining is a superior loading control to beta-actin for Western blots. *Analytical biochemistry*. 2013;440(2):186-8.
2. Sander H, Wallace S, Plouse R, Tiwari S, Gomes AV. Ponceau S waste: Ponceau S staining for total protein normalization. *Analytical biochemistry*. 2019;575:44-53.

**Supplementary Figure 1. Timeline of the experiments.**

**Supplementary Figure 2. Diagrams of rat brain sections showing representative microinjection sites (filled circles) in the hippocampus and amygdala.** Only data from animals showing bilateral needle tracks terminating in the hippocampus or amygdala and no damage to the target tissues were included in the final analyses.

**Supplementary Figure 3. Western Blot analysis of the main components of the ECS in the hippocampus (A-E) and amygdala (F-J) of juvenile *Fmr1<sup>-A</sup>exon 8* rats and WT controls.** Western blots showing DAGL $\alpha$  (A), MAGL (B), FAAH (C), CB1 (D) and CB2 (E) protein expression (top panels) and their relative densitometric analysis (bottom panels) in the hippocampus of WT and *Fmr1<sup>-A</sup>exon 8* rats at PND 35. Western blots showing DAGL $\alpha$  (F), MAGL (G), FAAH (H), CB1 (I) and CB2 (J) protein expression (top panels) and their relative densitometric analysis (bottom panels) in the amygdala of WT and *Fmr1<sup>-A</sup>exon 8* rats at PND 35. The levels of each protein were normalized to Ponceau staining (WT = 4; *Fmr1<sup>-A</sup>exon 8* = 4 animals per group). Data represent mean  $\pm$  SEM.

**Supplementary Figure 4. qPCR analysis of the main components of the ECS in the hippocampus and amygdala of adult *Fmr1<sup>-A</sup>exon 8* rats and WT controls.** Fold induction of the enzymes NAPE-PLD (A, J), DAGL $\alpha$  (B, K), DAGL $\beta$  (C, L), MAGL (D, M), FAAH (E, N), and CB1 (F, O), CB2 (G, P), TRPV1 (H, Q), GPR55 (I, R) receptor expression in the hippocampus (A-I) and amygdala (J-R) of *Fmr1<sup>-A</sup>exon 8* rats and WT animals, evaluated at PND

80 (WT = 3-4; *Fmr1*<sup>-Δ</sup> *exon 8* = 3-4 animals per group). Data represent mean ± SEM, \*p<0.05 and \*\*p<0.01 vs WT group (Student's t-test).

**Supplementary Table 1.** Forward and reverse primer sequences, used in qPCR experiments, for amplification cycles of enzymes and receptors of the ECS.

### A) Biochemical experiments

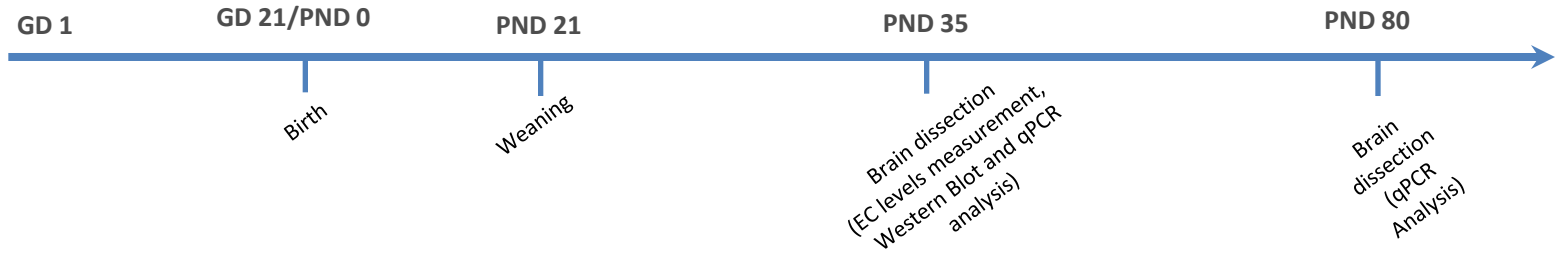

### B) Systemic administration of URB597

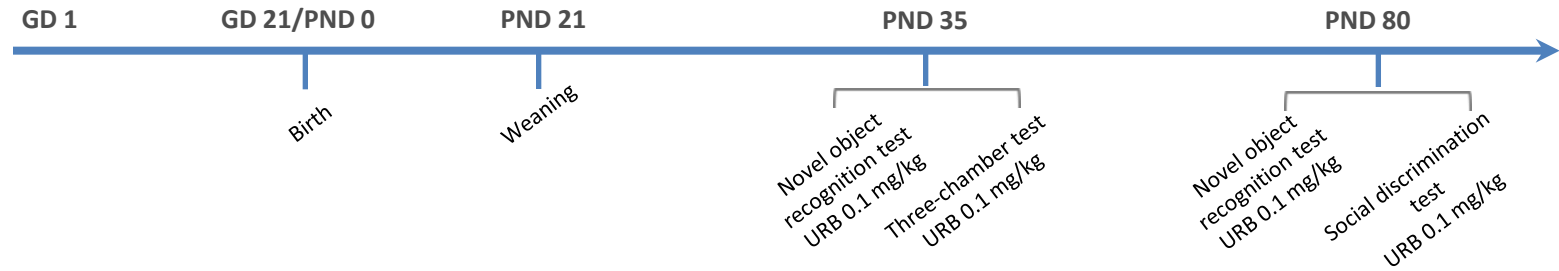

### C) Intracranial infusion of URB597 or SR141716A

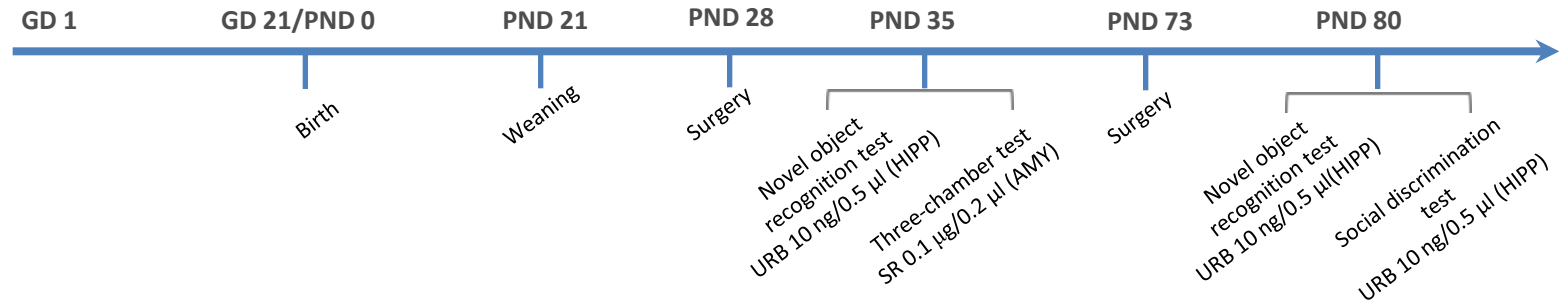

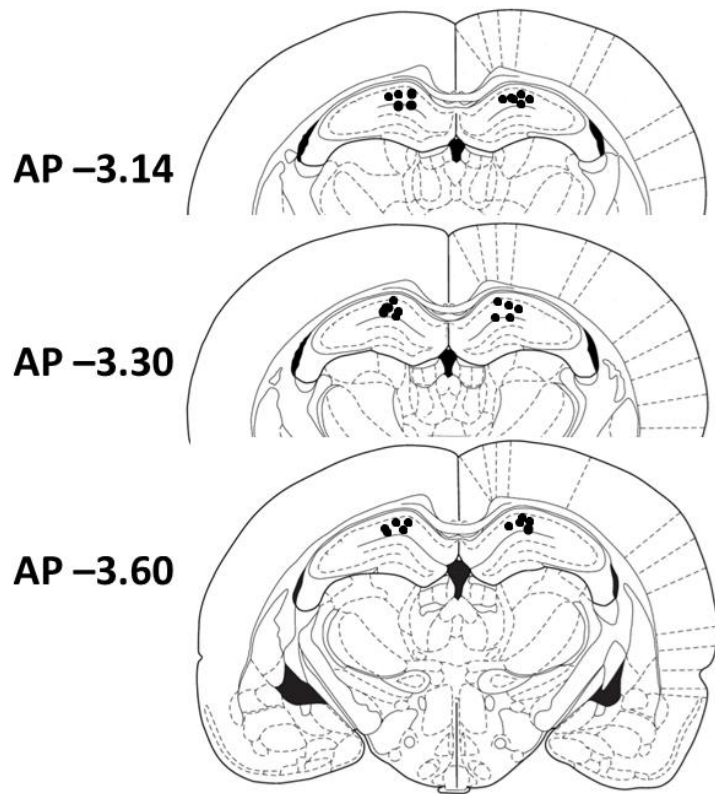

(a) Hippocampus

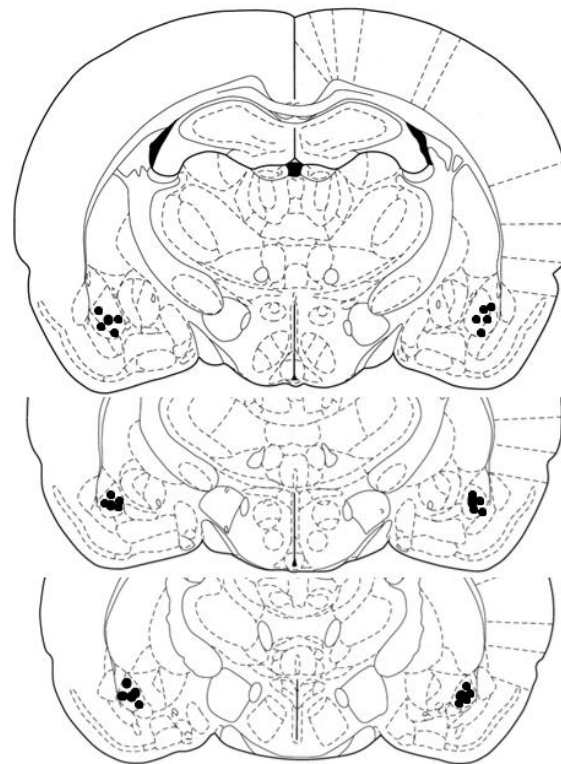

(b) Amygdala

## Hippocampus PND 35

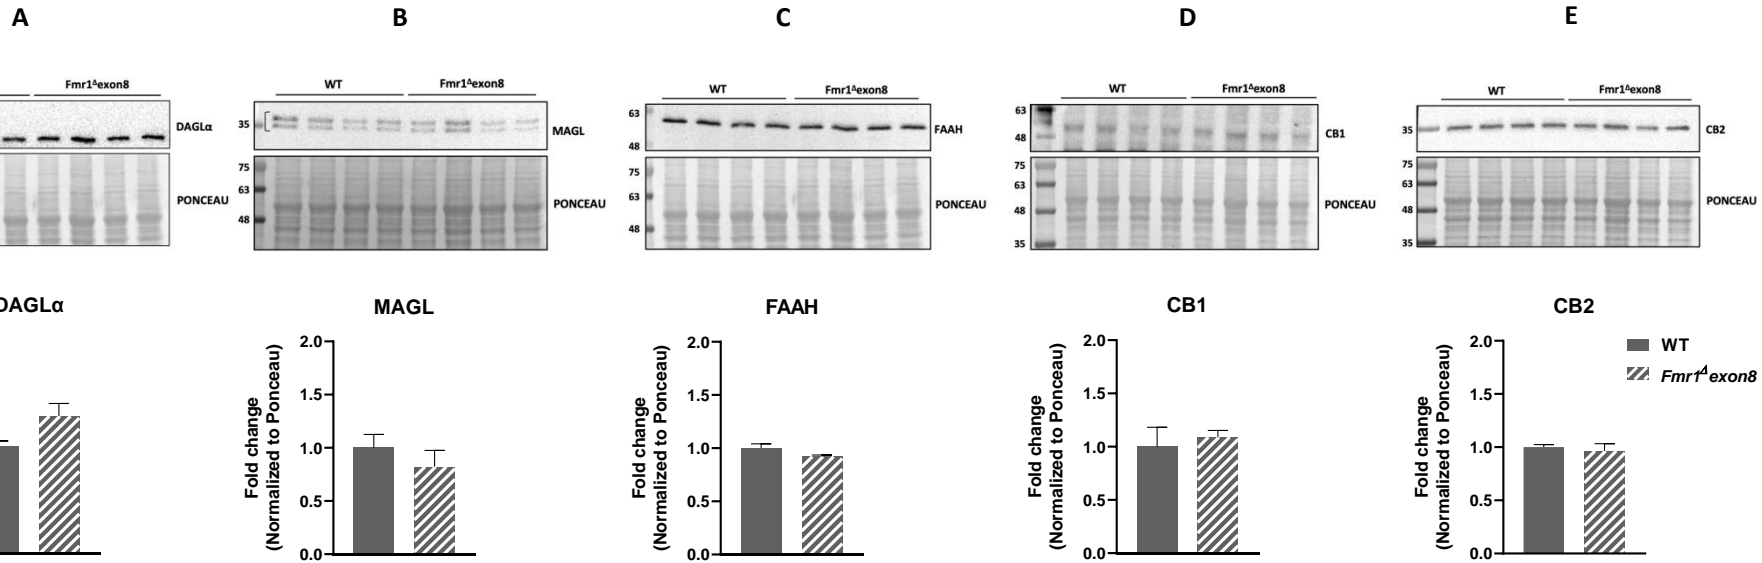

## Amygdala PND 35

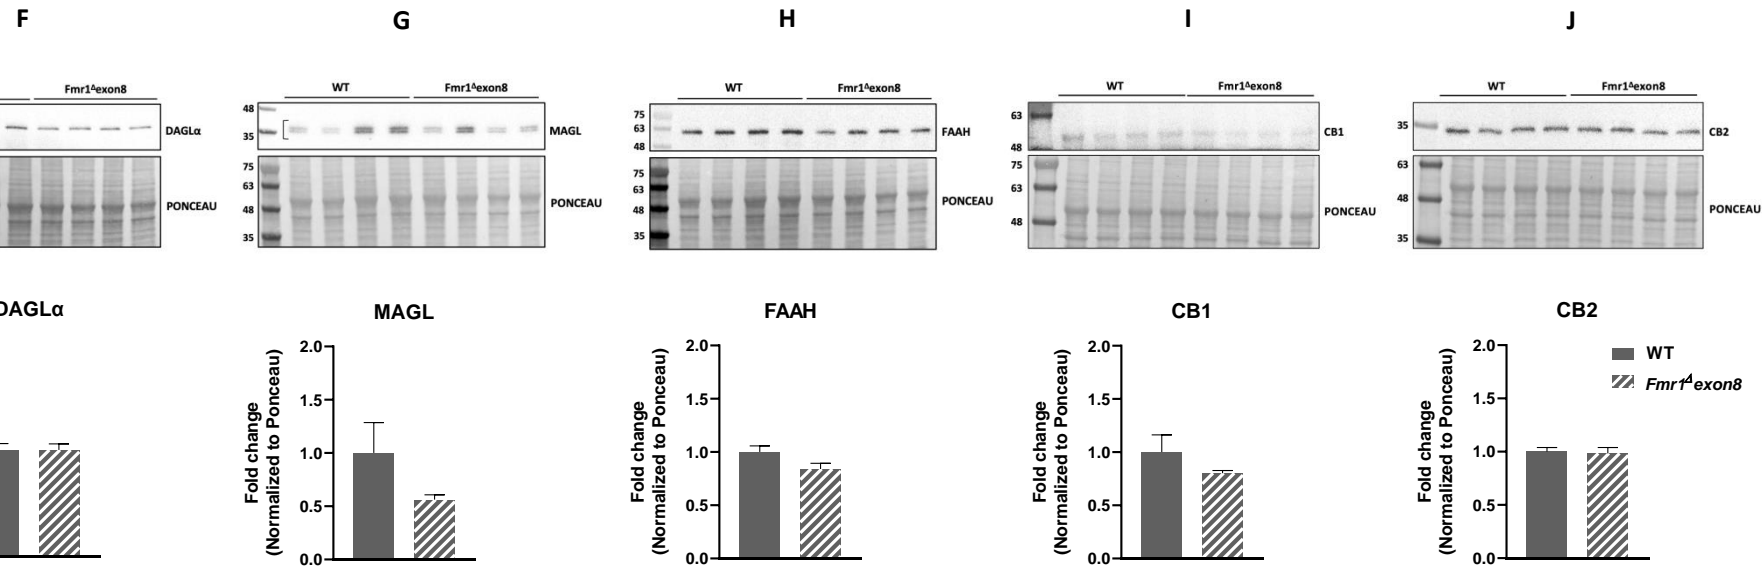

## Hippocampus PND 80

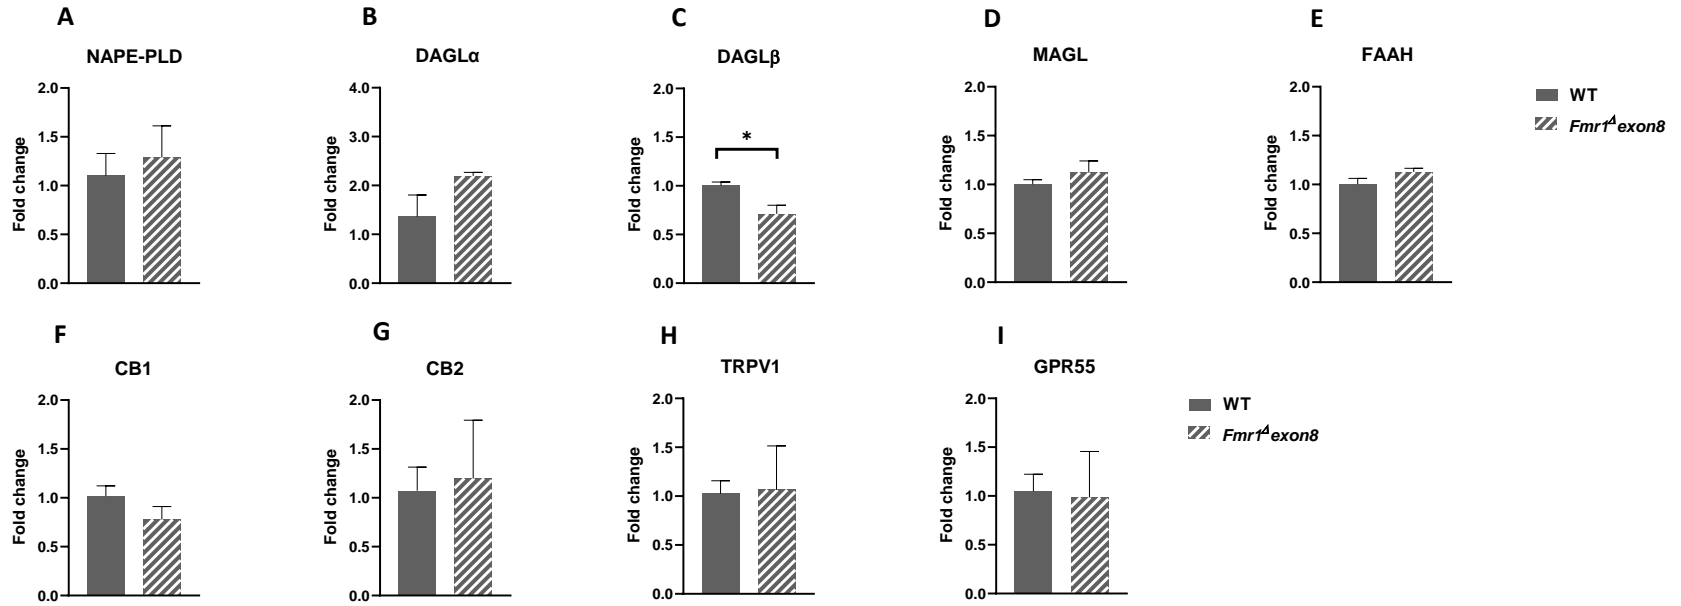

## Amygdala PND 80

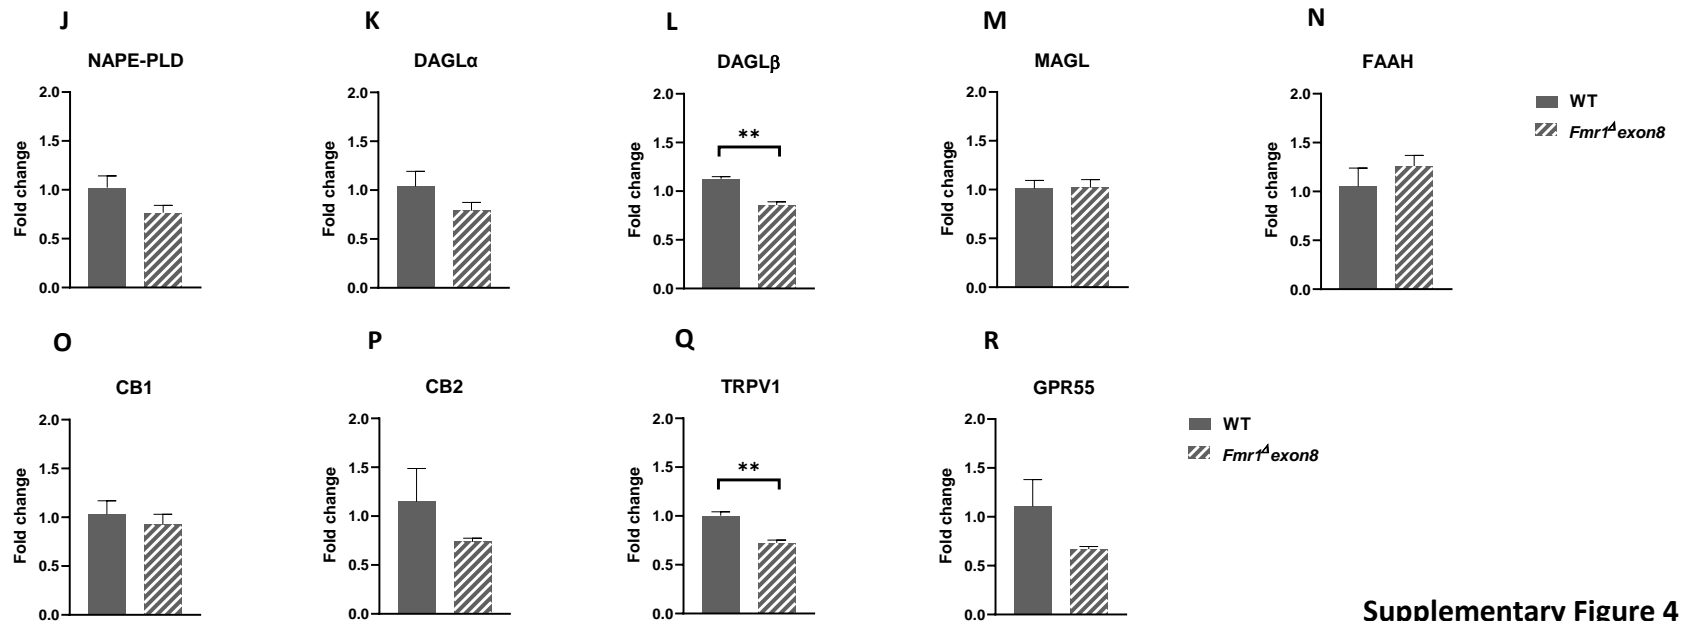

Supplement: 41386_2022_1454_MOESM2_ESM.pdf [file 41386_2022_1454_MOESM2_ESM.pdf]
